# Supplementary material
Source: publisher figshare collection journal article supplement (https://sage.figshare.com/ndownloader/files/21802920)
Supplement: Supplementary file 1 [file 21802920]

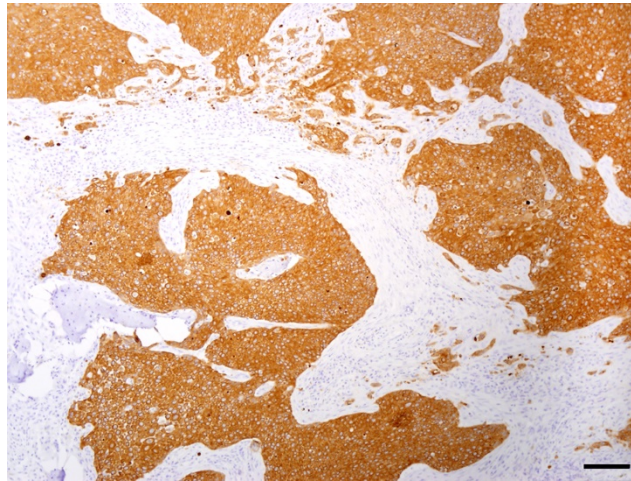

**Supplementary Figure 1.** Photomicrograph of a mandibular squamous cell carcinoma in a green-winged macaw. Cytoplasm of neoplastic cells is strongly pancytokeratin positive by immunohistochemistry. Pancytokeratin AE1/AE3. Bar = 100  $\mu$ m.
